# Supplementary material
Source: MDPI journal article supplement (https://www.mdpi.com/1424-8247/17/4/524)
Supplement: s1 [file s1]

Table S1

Concentration and peak area of Calibration curves

| $\mu\text{g/mL}$ | MAG Peak area | HE Peak area | NC Peak area | CHE Peak area |
|------------------|---------------|--------------|--------------|---------------|
| 1                | 13.5          | 14.8         | 61.3         | 44.4          |
| 10               | 153.8         | 145.8        | 631.4        | 448.8         |
| 20               | 324           | 308.7        | 1344.2       | 956.1         |
| 50               | 765.5         | 754.9        | 3206.6       | 2245.8        |
| 100              | 1502.6        | 1431.9       | 6249         | 4759.4        |
| 200              | 2845.8        | 2789.4       | 12300.3      | 10272.4       |

Table S2

Calibration curves

| Compound | Calibration Equation   | R <sup>2</sup> | Linearity Range      |
|----------|------------------------|----------------|----------------------|
| MAG      | $y = 14.225x + 30.891$ | 0.9991         | 0.01~2 $\mu\text{g}$ |
| HE       | $y = 13.909x + 24.386$ | 0.9995         | 0.01~2 $\mu\text{g}$ |
| NC       | $y = 61.363x + 68.934$ | 0.9998         | 0.01~2 $\mu\text{g}$ |
| CHE      | $y = 51.279x - 135.04$ | 0.9982         | 0.01~2 $\mu\text{g}$ |

Table S3

Limit of Detection and Limit of Quantification

|     | LOQ / $\mu\text{g}$ | LOD / $\mu\text{g}$ |
|-----|---------------------|---------------------|
| MAG | 0.01                | 0.003               |
| HE  | 0.01                | 0.003               |
| NC  | 0.01                | 0.003               |
| CHE | 0.01                | 0.003               |

Table S4

Precision

| MAG<br>Peak area | RSD<br>(%) | HE<br>Peak area | RSD<br>(%) | NC<br>Peak area | RSD<br>(%) | CHE Peak<br>area | RSD<br>(%) |
|------------------|------------|-----------------|------------|-----------------|------------|------------------|------------|
| 765.8            | 2.03       | 741.5           | 2.38       | 3128            | 0.47       | 2390.1           | 0.24       |
| 763.4            |            | 698.4           |            | 3117.8          |            | 2285.7           |            |
| 747.7            |            | 701.5           |            | 3098.6          |            | 2279.7           |            |
| 731.7            |            | 701.5           |            | 3106.9          |            | 2283.3           |            |
| 733.6            |            | 702.1           |            | 3137.1          |            | 2317             |            |
| 755.9            |            | 709.8           |            | 3129            |            | 2299.4           |            |

Table S5

Stability

| Time/<br>h | MAG   | RSD<br>(%) | HE    | RSD<br>(%) | NC     | RSD<br>(%) | CHE    | RSD (%) |
|------------|-------|------------|-------|------------|--------|------------|--------|---------|
| 0          | 763.7 | 2.22       | 745.2 | 2.11       | 3150   | 1.74       | 2184.4 | 2.23    |
| 1          | 754.2 |            | 751.6 |            | 3163.6 |            | 2207.8 |         |
| 2          | 730.7 |            | 732   |            | 3163.3 |            | 2265   |         |
| 4          | 740.5 |            | 741.5 |            | 3100.8 |            | 2328.6 |         |
| 6          | 722.4 |            | 744.2 |            | 3136.5 |            | 2313.3 |         |
| 8          | 766.5 |            | 735.9 |            | 3137.5 |            | 2268.7 |         |
| 12         | 733.8 |            | 702.4 |            | 3177.6 |            | 2315.6 |         |
| 24         | 742.6 |            | 740.3 |            | 3011.3 |            | 2319.4 |         |

Table S6

## Repeatability

| mg/mL | MAG<br>Peak<br>area | Content<br>(%) | Average<br>content<br>(%) | RSD<br>(%) | HE<br>Peak<br>area | Content<br>(%) | Average<br>content<br>(%) | RSD<br>(%) |
|-------|---------------------|----------------|---------------------------|------------|--------------------|----------------|---------------------------|------------|
| 2.01  | 356                 | 1.13           | 1.103                     | 1.99       | 276                | 0.91           | 0.904                     | 0.86       |
| 1.96  | 350.2               | 1.14           |                           |            | 275.4              | 0.92           |                           |            |
| 1.98  | 345.8               | 1.11           |                           |            | 281.5              | 0.93           |                           |            |
| 2.04  | 345.7               | 1.08           |                           |            | 276.6              | 0.88           |                           |            |
| 2.03  | 342.1               | 1.07           |                           |            | 277                | 0.89           |                           |            |
| 2.04  | 337.9               | 1.05           |                           |            | 276.7              | 0.89           |                           |            |

## Repeatability

| mg/mL | NC<br>Peak<br>area | Content<br>(%) | Average<br>content<br>(%) | RSD<br>(%) | CHE<br>Peak<br>area | Content<br>(%) | Average<br>content<br>(%) | RSD<br>(%) |
|-------|--------------------|----------------|---------------------------|------------|---------------------|----------------|---------------------------|------------|
| 2.01  | 727                | 0.53           | 0.535                     | 0.33       | 133.8               | 0.91           | 0.297                     | 0.24       |
| 1.96  | 727.9              | 0.55           |                           |            | 134.6               | 0.92           |                           |            |
| 1.98  | 727.8              | 0.54           |                           |            | 134.3               | 0.93           |                           |            |
| 2.04  | 732.3              | 0.52           |                           |            | 135.8               | 0.88           |                           |            |
| 2.03  | 731.1              | 0.53           |                           |            | 134.5               | 0.89           |                           |            |
| 2.04  | 731                | 0.52           |                           |            | 133.8               | 0.89           |                           |            |

Table S7

## Spike-and-recovery experience

| Compound | Sample<br>/mg | Content<br>/μg | Added<br>/μg | Measured<br>/μg | Recovery<br>(%) | Average<br>Recovery<br>(%) | RSD<br>(%) |
|----------|---------------|----------------|--------------|-----------------|-----------------|----------------------------|------------|
| MAG      | 2.01          | 22.13          | 22           | 44.09           | 99.82           | 99.71                      | 0.12       |
|          | 2.01          | 22.13          | 22           | 44.03           | 99.57           |                            |            |
|          | 2.01          | 22.13          | 22           | 44.07           | 99.73           |                            |            |
| HE       | 2.01          | 18.29          | 18           | 36.12           | 99.06           | 99.8                       | 1.02       |
|          | 2.01          | 18.29          | 18           | 36.17           | 99.38           |                            |            |
|          | 2.01          | 18.29          | 18           | 36.46           | 100.98          |                            |            |
| NC       | 2.01          | 10.88          | 7            | 18.08           | 102.93          | 103.53                     | 0.5        |
|          | 2.01          | 10.88          | 7            | 18.15           | 103.86          |                            |            |
|          | 2.01          | 10.88          | 7            | 18.14           | 103.81          |                            |            |
| CHE      | 2.01          | 6.1            | 7            | 13.22           | 101.71          | 102.28                     | 0.48       |
|          | 2.01          | 6.1            | 7            | 13.27           | 102.47          |                            |            |
|          | 2.01          | 6.1            | 7            | 13.28           | 102.64          |                            |            |

Table S8

## Content

| Compound |       | Peak area |       | Average area | Average content (%) | RSD (%) |
|----------|-------|-----------|-------|--------------|---------------------|---------|
| MAG      | 335.3 | 324.9     | 333.5 | 331.2        | 1.05                | 1.85    |
| HE       | 278.8 | 274.8     | 275.8 | 276.4        | 0.91                | 0.82    |
| NC       | 736.5 | 736       | 737.5 | 736.6        | 0.54                | 0.11    |
| CHE      | 135   | 135.5     | 136.1 | 135.5        | 0.29                | 0.18    |

Figure S1

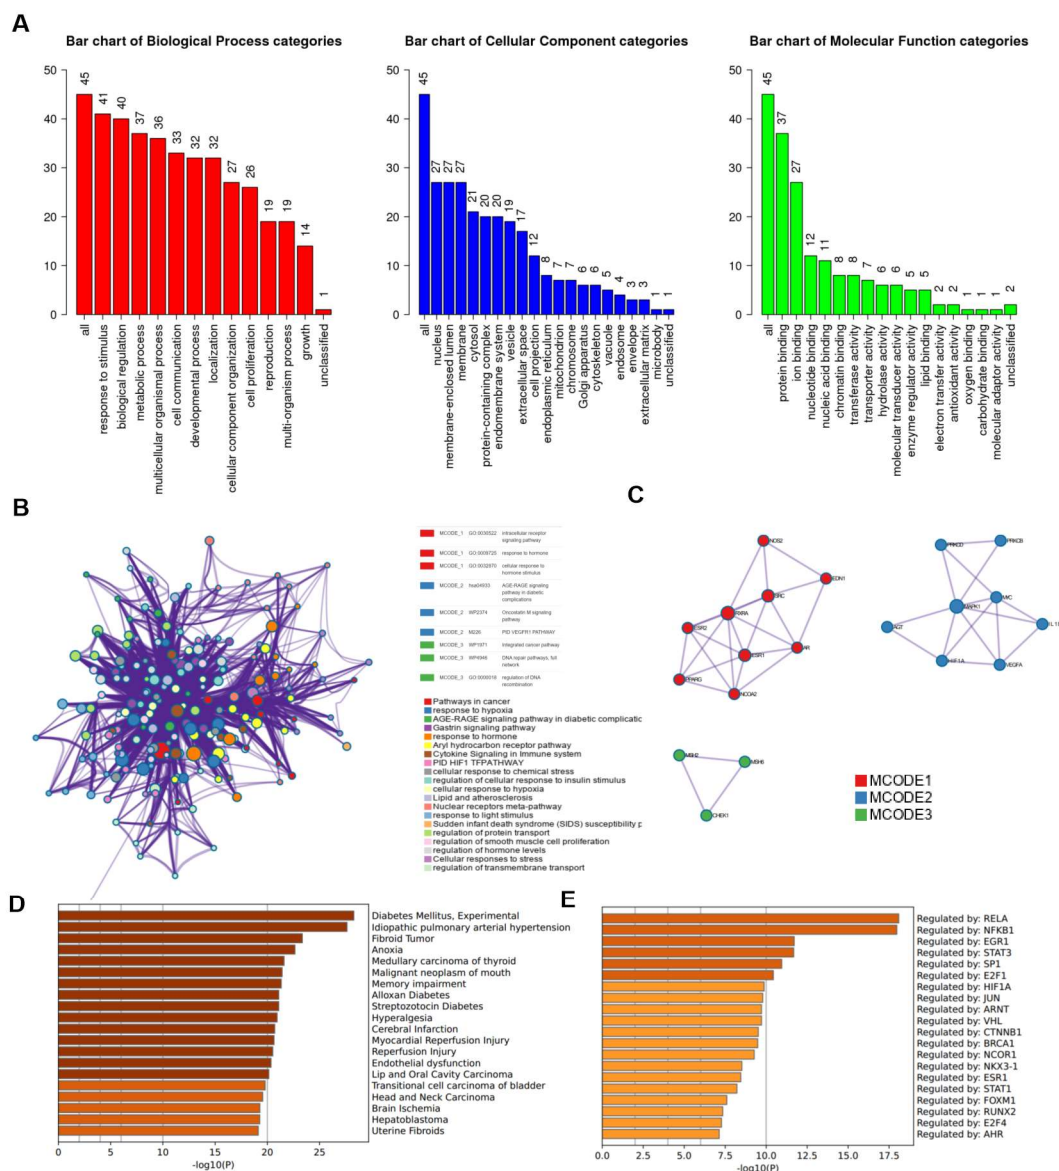

Figure S1. Network pharmacological analysis of CHE. (A) GO function enrichment analysis. (B) Network visualization of the interactive network. (C) MCODE complexes identified in Metascape. (D) Enrichment analysis of CHE on the platform of DisGeNET. (E) Enrichment analysis of CHE on the platform of TRRUST.

Figure S2

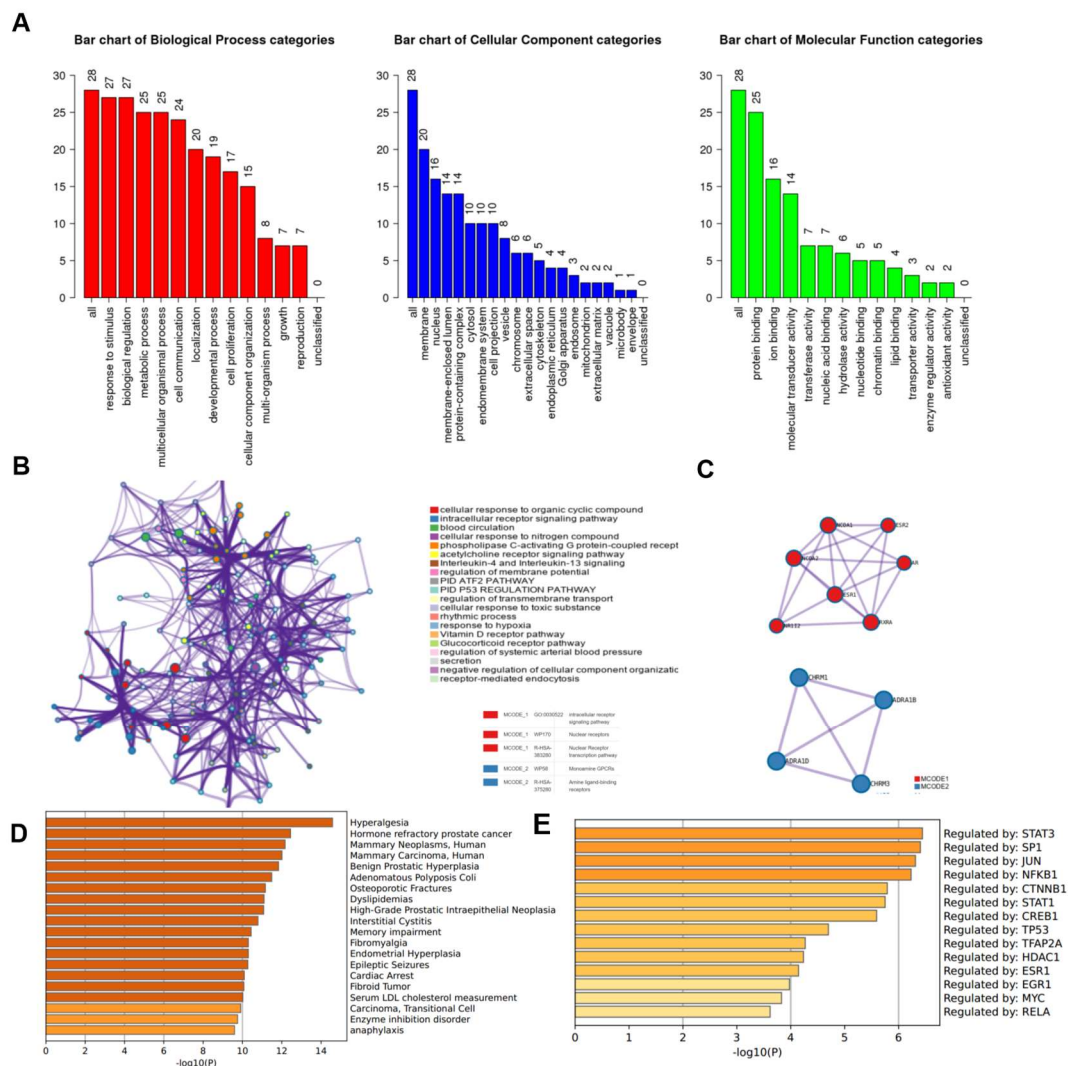

Figure S2. Network pharmacological analysis of MAG. (A) GO function enrichment analysis. (B) Network visualization of the interactive network. (C) MCODE complexes identified in Metascape. (D) Enrichment analysis of MAG on the platform of DisGeNET. (E) Enrichment analysis of CHE on the platform of TRRUST.

Figure S3

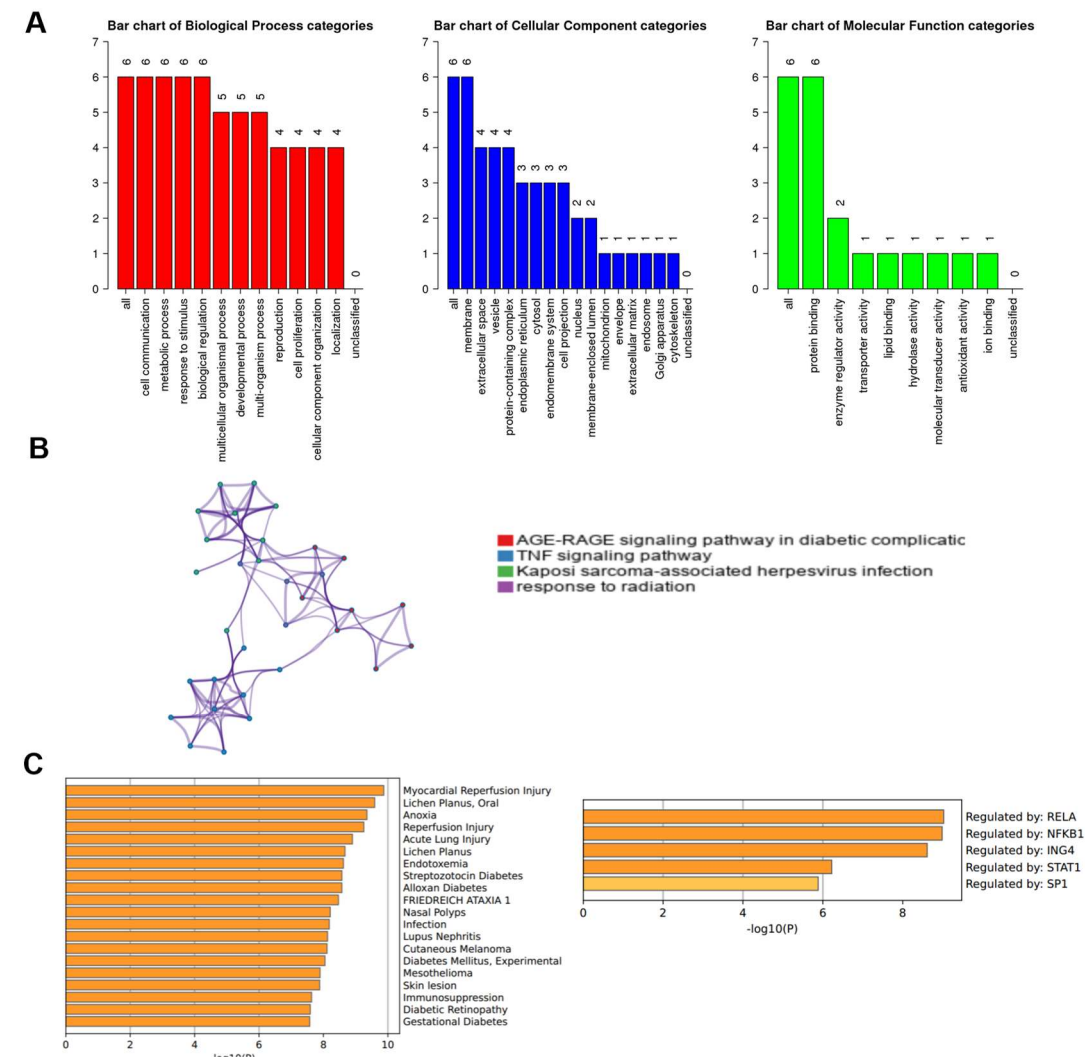

Figure S3. Network pharmacological analysis of HE. (A) GO function enrichment analysis. (B) Network visualization of the interactive network. (C) Enrichment analysis of HE on the platform of DisGeNET and TRRUST.

Figure S4

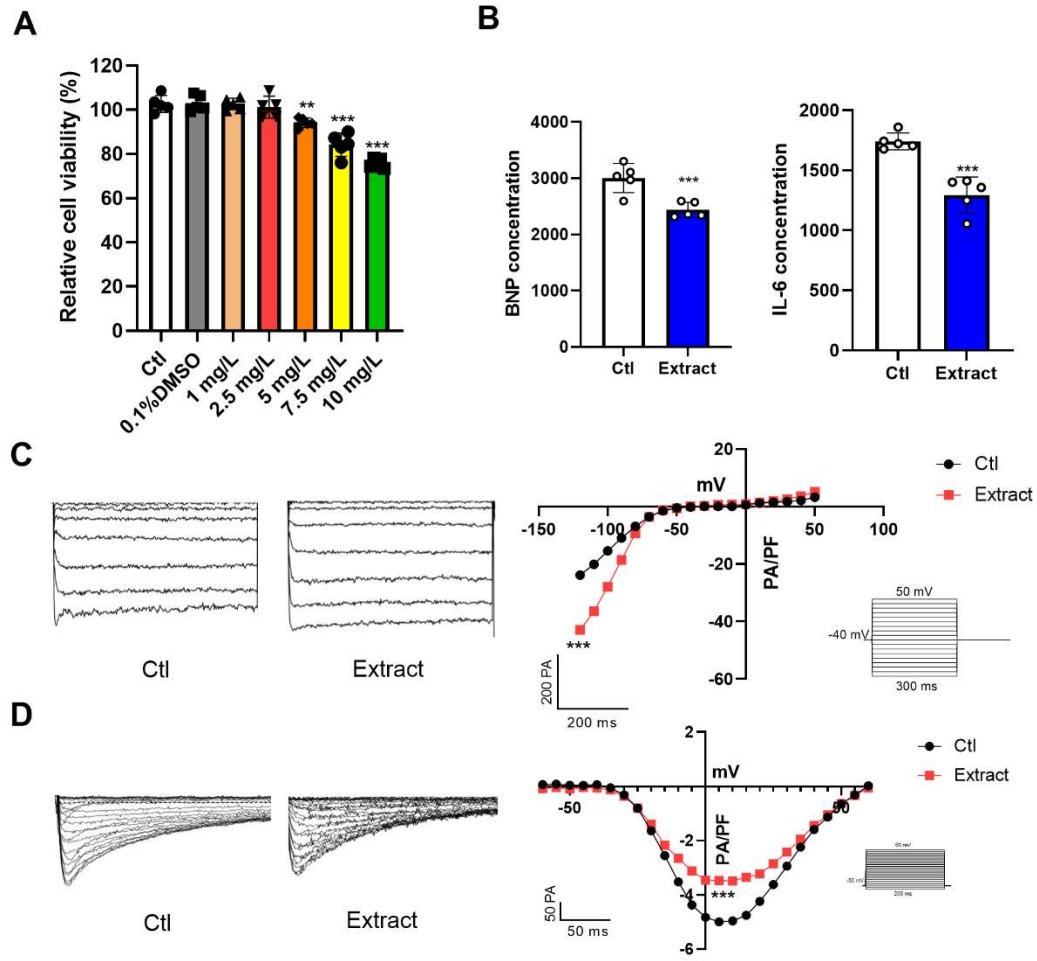

Figure S4. The biological activity of extract. (A) Effect of the extract on the viability of myocardial cells ( $n = 5$ ). (B) IL-6 and BNP levels in heart-on-a-chip model treated with the extract of *Z. nitidum* ( $n = 5$ ). (C) Effect of the extract on  $I_{K1}$  in the myocardium ( $n = 8$ ). (D) Effect of the extract on  $I_{Ca-L}$  in the myocardium ( $n = 8$ ). The data are presented as the mean  $\pm$  S.E.M, \*\* $p < 0.01$ , \*\*\* $p < 0.001$  vs. the control group.
